# Supplementary material for: Liraglutide Protects Against Brain Amyloid-β1–42 Accumulation in Female Mice with Early Alzheimer’s Disease-Like Pathology by Partially Rescuing Oxidative/Nitrosative Stress and Inflammation
Source: MDPI journal article supplement (doi:10.3390/ijms21051746), 2020-03-04
Supplement: s1 [file s1]

## Supplementary Figure

A.

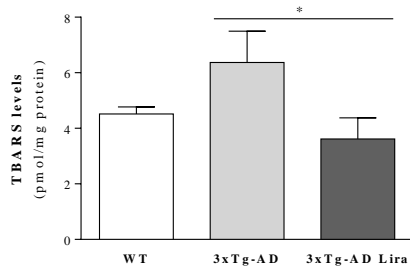

B.

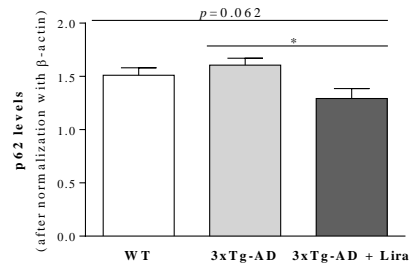

**Supplementary Figure 1.** Effect of liraglutide on brain cortical lipid oxidation and p62 markers in female mice with early AD-like pathology. Brain cortical TBARS (A) and p62 protein levels (B, after reprobing from membranes labeled to OPA1) were determined. Data are the mean  $\pm$  SE from 5-6 mice/group. Statistical significance: \* $p < 0.05$ , by the one-way ANOVA with the Fisher LSD post-hoc test for multiple comparisons.
